# Supplementary material
Source: PubMed Central journal article supplement (PMC4136326)
Supplement: JVI.00789-14_zjv999099381so2.pdf [file JVI.00789-14_zjv999099381so2.pdf]

| Number | Sequence <sup>a</sup>              | Dominant | I-Ak+ | Differentially affected (IL-4) |
|--------|------------------------------------|----------|-------|--------------------------------|
| 1      | KEKTWVTIYYGVFVWREATT               |          |       |                                |
| 2      | GVFVWREATTTLFCASDAKA               |          |       | x                              |
| 3      | TLFCASDAKAYDTEVHNVWA               |          | xx    | x                              |
| 4      | YDTEVHNVWA <sup>a</sup> THACVPTDPN |          | x     | x                              |
| 5      | THACVPTDPN <b>PQEVVL</b> GNVT      |          | x     | x                              |
| 6      | PQEVVLGNVTENFNMMWKNM               | x        |       |                                |
| 7      | ENFNMMWKNMVD <b>QMHEDIIS</b>       |          | x     | x                              |
| 8      | VDQMHEDIISLWDESLKPCV               |          |       |                                |
| 9      | LWDESLKPCVKLTPFLCVTLN              |          |       |                                |
| 10     | KLTPFLCVTLNCTNLNITKNT              |          |       |                                |
| 11     | CTNLNITKNTTNPTSSSWG                |          |       |                                |
| 12     | TNPTSSSWGMMKEGEIKNCS               |          |       |                                |
| 13     | MEKGEIKNCSFYITTSIRNK               |          |       |                                |
| 14     | FYITTSIRNKVKKEYALFNR               |          |       |                                |
| 15     | VKKEYALFNRLDVPVPIENTN              |          |       |                                |
| 16     | <b>LDVVP</b> IENTNNTKYRLISCN       |          | x     | x                              |
| 17     | NTKYRLISCNTSVITQACPK               |          |       |                                |
| 18     | TSVITQACPKVSFOPIPIHY               |          |       |                                |
| 19     | VSFQPIPIHYCVFAGFAMLK               | x        |       |                                |
| 20     | CVFAGFAMLKCNNTFNGSG                |          |       | x                              |
| 21     | CNNKTFNGSGPCTNVSTVQC               |          |       |                                |
| 22     | PCTNVSTVQCTHGIRPVVST               |          |       |                                |
| 23     | THGIRPVVSTQLLNGSLAE                |          |       |                                |
| 24     | QLLNGSLAEED <b>DIVIRSENF</b>       |          | x     | x                              |
| 25     | <b>EDIVIRSENF</b> TDNAKTIIIVQ      |          | x     | x                              |
| 26     | <b>TDNAKTIIIVQ</b> LNESVVINCT      |          | x     | x                              |
| 27     | LNESVVINCTRFNNNTRRRL               |          |       | x                              |
| 28     | RFNNNTRRRLSIGPGRAFYA               |          |       | x                              |
| 29     | SIGPGRAFYARRNIIGDIRQ               |          |       |                                |
| 30     | RRNIIG <b>DIRQ</b> AHCNISRAKW      | x        | x     |                                |
| 31     | AHCNISRAKWNTLQQIIVIK               |          |       |                                |
| 32     | NNTLQQIIVIKLREKFRNKTI              | x        |       |                                |
| 33     | LREKFRNKTIAFNQSSGGDP               |          |       | x                              |
| 34     | AFNQSSGG <b>DPEIVMHS</b> FNCG      |          | x     | x                              |
| 35     | EIVMHSFNCGGEFFYCNTAQ               |          |       | x                              |
| 36     | GEFFYCNTAQLFNSTWNVGTG              |          |       | x                              |
| 37     | LFNSTWNVGTGNGTEGNDI                |          |       | x                              |
| 38     | GTNGTEGNDI <b>ITLQCR</b> IKQI      |          | x     |                                |
| 39     | ITLQCRIKQIINMWQVKGKA               | x        |       |                                |
| 40     | INMWQVKGKAMYAPPITGQI               |          |       |                                |
| 41     | MYAPPITGQIRCSSNITGLL               |          |       | x                              |
| 42     | RCSSNITGLLITRDGGNSTE               |          |       |                                |
| 43     | LITRDGGNSTE <b>TE</b> IFRPGG       |          | x     | x                              |
| 44     | TEIFRPGG <b>DMRDNR</b> SE          |          | x     | x                              |
| 45     | DMRDNR <b>SELYKY</b> KVVRIE        |          | x     | x                              |
| 46     | LYKYKVVRIEPIGVAPTRAK               |          |       |                                |
| 47     | PIGVAPTRAKRRTVQREKRA               | x        |       |                                |

<sup>a</sup> Bold underlined sequence indicates I-Ak-binding motif(s)

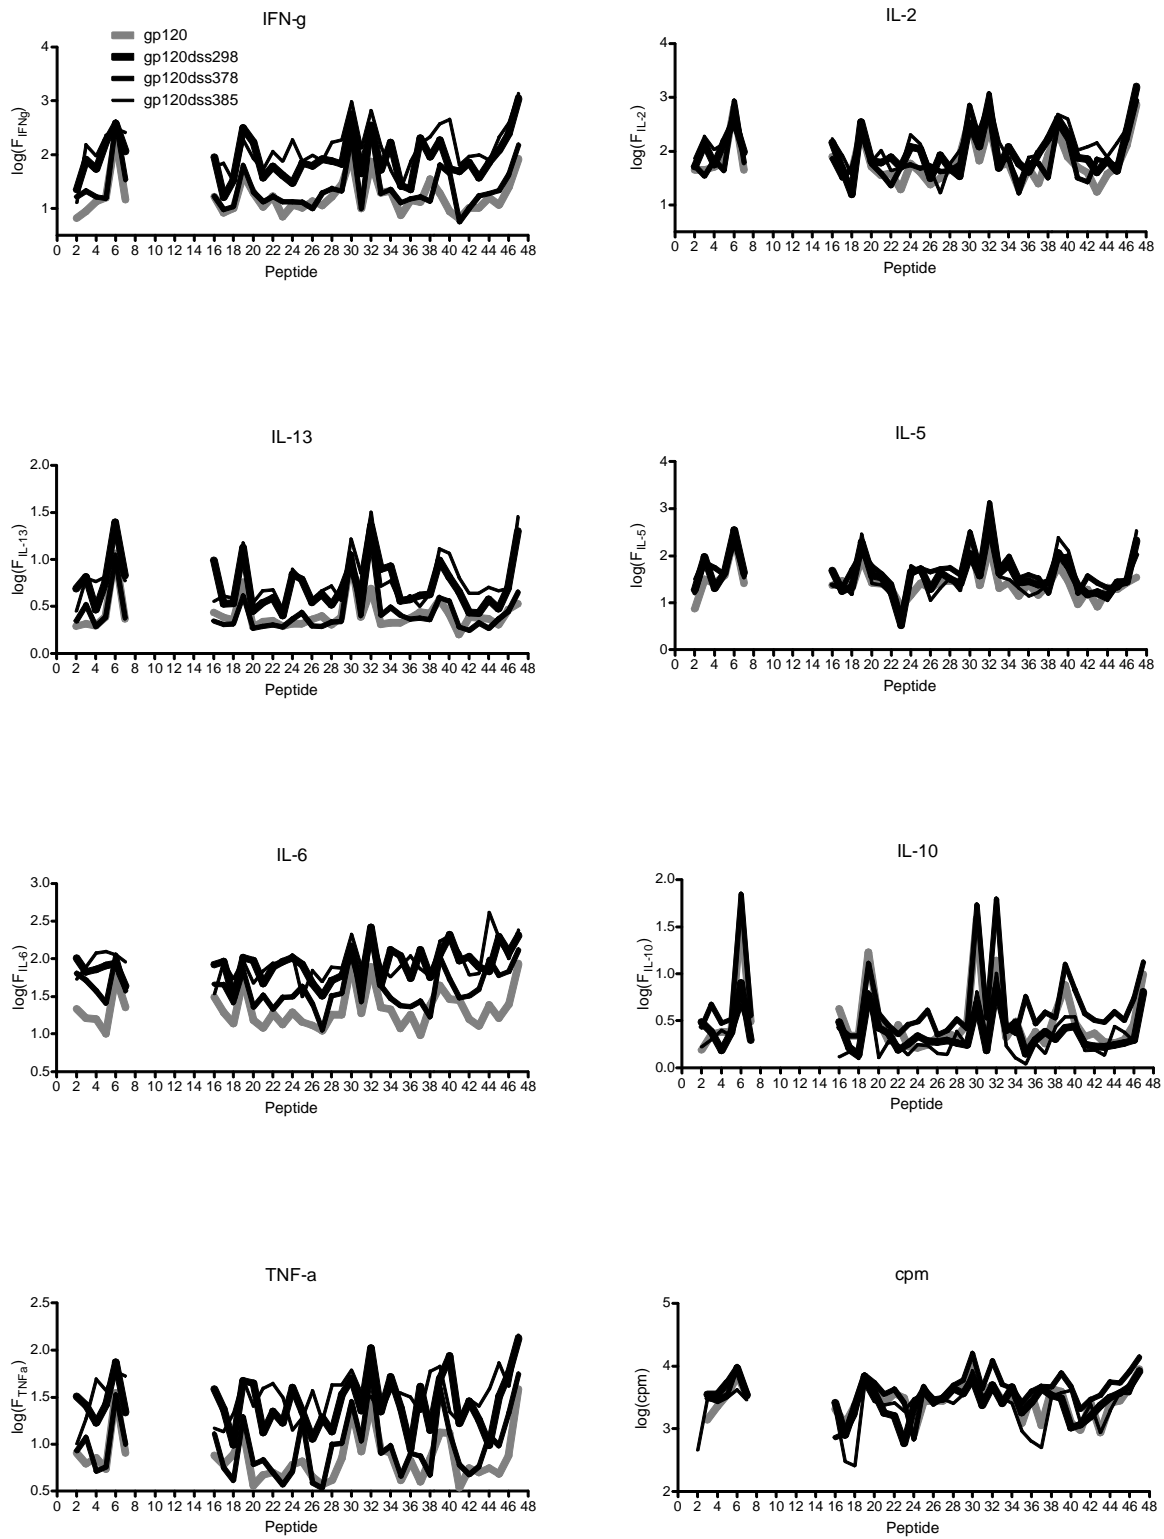

Figure S1. Average peptide-specific responses following immunization of nine mice with wild-type or disulfide-variant gp120. Responses were broadly greater for the disulfide variants.

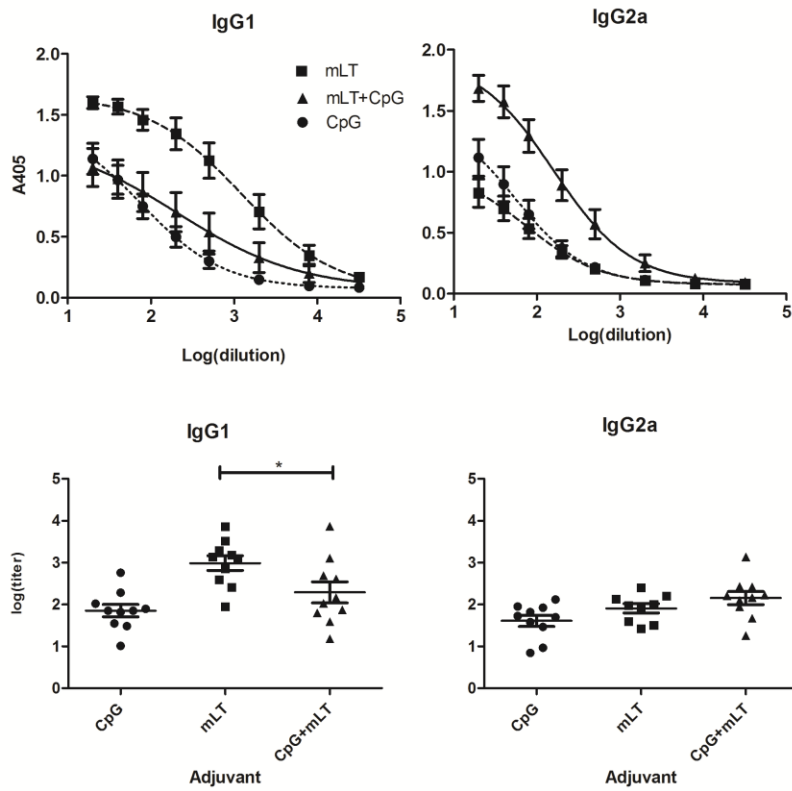

Figure S2. Shift in the subtype composition of gp120-specific antibody caused by inclusion of CpG with mLT in the adjuvant formulation. The concentration of IgG1 decreased, and the Log(titer) of IgG1 shifted to a lower value. The concentration of IgG2a increased.
